# Supplementary material for: Estimating incidence of type 1 and type 2 diabetes using prevalence data: the SEARCH for Diabetes in Youth study
Source: PubMed Central journal article supplement (PMC9930314; doi:10.1186/s12874-023-01862-3), 2023-02-14
Supplement: 12874_2023_1862_MOESM1_ESM.pdf [file 12874_2023_1862_MOESM1_ESM.pdf]

Additional information to “Estimating incidence of type 1 and type 2 diabetes using prevalence data: the SEARCH for Diabetes in Youth Study”

**S1 Table. Observed and estimated average incidence rates of type 1 diabetes**

| Age     | Average observed incidence rate (per 100.000 person-years) |                      | Average estimated incidence rate (per 100.000 person-years) |                      | Relative error (in %)      |                            |
|---------|------------------------------------------------------------|----------------------|-------------------------------------------------------------|----------------------|----------------------------|----------------------------|
|         | Male                                                       | Female               | Male                                                        | Female               | Male                       | Female                     |
| 0 - 1   | 2.05<br>[1.28; 3.30]                                       | 2.39<br>[1.53; 3.75] | 11.1<br>[8.92; 13.3]                                        | 12.6<br>[10.3; 15.0] | 304.66<br>[174.62; 477.89] | 263.69<br>[158.60; 393.96] |
| 1 - 2   | 19.4<br>[16.6; 22.6]                                       | 13.2<br>[10.9; 15.9] | 13.1<br>[10.6; 15.6]                                        | 14.7<br>[12.1; 17.4] | -43.49<br>[-56.28; 30.74]  | -22.58<br>[-40.75; -3.87]  |
| 2 - 3   | 15.5<br>[13.0; 18.4]                                       | 15.8<br>[13.3; 18.9] | 15.0<br>[12.2; 17.8]                                        | 16.7<br>[13.8; 19.7] | -17.78<br>[-35.78; -0.54]  | -17.80<br>[-35.20; -0.80]  |
| 3 - 4   | 18.2<br>[15.5; 21.3]                                       | 19.9<br>[17.0; 23.2] | 16.9<br>[13.8; 20.0]                                        | 18.7<br>[15.4; 22.0] | -28.26<br>[-43.14; -12.94] | -21.65<br>[-36.85; -6.06]  |
| 4 - 5   | 19.4<br>[16.6; 22.6]                                       | 25.1<br>[21.8; 28.8] | 18.6<br>[15.2; 22.0]                                        | 20.5<br>[16.9; 24.1] | -1.71<br>[-18.81; 15.28]   | -12.22<br>[-26.34; 1.84]   |
| 5 - 6   | 21.6<br>[18.7; 25.0]                                       | 27.0<br>[23.6; 30.8] | 20.2<br>[16.5; 23.9]                                        | 22.0<br>[18.1; 25.9] | 7.06<br>[-11.24; 24.95]    | -2.22<br>[-17.49; 13.01]   |
| 6 - 7   | 25.1<br>[21.9; 28.7]                                       | 24.9<br>[21.7; 28.6] | 21.6<br>[17.6; 25.6]                                        | 23.2<br>[19.0; 27.4] | 7.85<br>[-10.02; 25.13]    | 4.68<br>[-12.44; 21.74]    |
| 7 - 8   | 22.5<br>[19.5; 26.0]                                       | 27.7<br>[24.3; 31.6] | 22.7<br>[18.4; 26.9]                                        | 24.0<br>[19.5; 28.5] | 4.01<br>[-15.87; 22.97]    | 6.98<br>[-10.51; 24.22]    |
| 8 - 9   | 30.9<br>[27.4; 34.9]                                       | 29.6<br>[26.1; 33.7] | 23.5<br>[19.0; 28.0]                                        | 24.3<br>[19.6; 29.1] | -14.44<br>[-29.64; 0.52]   | 0.71<br>[-15.69; 17.69]    |
| 9 - 10  | 28.2<br>[24.8; 32.0]                                       | 31.4<br>[27.8; 35.5] | 24.0<br>[19.2; 28.7]                                        | 24.2<br>[19.3; 29.2] | -12.14<br>[-28.64; 5.06]   | -14.34<br>[-30.62; 2.15]   |
| 10 - 11 | 31.7<br>[28.2; 35.7]                                       | 35.8<br>[32.0; 40.1] | 24.2<br>[19.2; 29.1]                                        | 23.7<br>[18.5; 28.8] | -23.67<br>[-39.44; -7.52]  | -29.28<br>[-43.27; -14.36] |
| 11 - 12 | 29.2<br>[25.9; 33.0]                                       | 35.1<br>[31.3; 39.3] | 24.1<br>[18.9; 29.2]                                        | 22.8<br>[17.4; 28.1] | -12.08<br>[-31.05; 6.64]   | -33.07<br>[-49.39; -17.44] |
| 12 - 13 | 32.1<br>[28.6; 36.0]                                       | 29.5<br>[26.1; 33.3] | 23.7<br>[18.3; 29.0]                                        | 21.5<br>[16.0; 27.0] | -16.43<br>[-33.07; -0.24]  | -25.68<br>[-43.93; -6.99]  |
| 13 - 14 | 30.4<br>[27.0; 34.1]                                       | 20.3<br>[17.5; 23.5] | 23.1<br>[17.5; 28.6]                                        | 20.1<br>[14.4; 25.7] | -17.53<br>[-36.19; 0.78]   | -2.02<br>[-29.52; 24.65]   |
| 14 - 15 | 28.8<br>[25.5; 32.5]                                       | 16.4<br>[13.9; 19.3] | 22.2<br>[16.6; 27.9]                                        | 18.4<br>[12.6; 24.1] | -37.83<br>[-56.31; -19.41] | 13.64<br>[-21.57; 48.81]   |
| 15 - 16 | 21.8<br>[19.0; 25.0]                                       | 13.9<br>[11.6; 16.6] | 21.3<br>[15.5; 27.1]                                        | 16.6<br>[10.7; 22.4] | 2.96<br>[-23.74; 28.97]    | -12.52<br>[-54.94; 30.19]  |
| 16 - 17 | 17.1<br>[14.7; 20.0]                                       | 13.1<br>[10.9; 15.7] | 20.2<br>[14.2; 26.2]                                        | 14.7<br>[8.68; 20.6] | 13.85<br>[-20.99; 49.64]   | -18.22<br>[-62.38; 27.72]  |
| 17 - 18 | 12.4<br>[10.3; 14.9]                                       | 12.5<br>[10.4; 15.1] | 19.0<br>[13.0; 25.2]                                        | 12.8<br>[6.66; 18.8] | 48.04<br>[-0.50; 97.44]    | -3.35<br>[-50.35; 43.71]   |
| 18 - 19 | 9.4<br>[7.58; 11.6]                                        | 6.67<br>[5.15; 8.62] | 17.8<br>[11.6; 24.1]                                        | 10.8<br>[4.62; 17.0] | 71.08<br>[5.51; 135.70]    | 73.32<br>[-14.84; 163.86]  |
| 19 - 20 | 3.29<br>[2.27; 4.77]                                       | 2.30<br>[1.47; 3.61] | 16.6<br>[10.3; 23.0]                                        | 8.87<br>[2.57; 15.1] | 319.04<br>[131.56; 522.32] | 217.11<br>[-46.18; 505.81] |

**S2 Table. Observed and estimated average incidence rates of type 2 diabetes**

| Age     | Average observed incidence rate (per 100.000 person-years) |                      | Average estimated incidence rate (per 100.000 person-years) |                      | Relative error (in %)         |                               |
|---------|------------------------------------------------------------|----------------------|-------------------------------------------------------------|----------------------|-------------------------------|-------------------------------|
|         | Male                                                       | Female               | Male                                                        | Female               | Male                          | Female                        |
| 0 - 1   | 0.00<br>[0.00; 0.00]                                       | 0.00<br>[0.00; 0.00] | 0.00<br>[0.00; 0.00]                                        | 0.00<br>[0.00; 0.00] | NA                            | NA                            |
| 1 - 2   | 0.20<br>[0.05; 0.79]                                       | 0.00<br>[0.00; 0.00] | 0.00<br>[0.00; 0.00]                                        | 0.00<br>[0.00; 0.00] | NA                            | NA                            |
| 2 - 3   | 0.00<br>[0.00; 0.00]                                       | 0.00<br>[0.00; 0.00] | 0.00<br>[0.00; 0.00]                                        | 0.05<br>[0.00; 0.31] | NA                            | NA                            |
| 3 - 4   | 0.10<br>[0.01; 0.71]                                       | 0.00<br>[0.00; 0.00] | 0.14<br>[0.00; 0.37]                                        | 0.80<br>[0.42; 1.23] | NA                            | NA                            |
| 4 - 5   | 0.00<br>[0.00; 0.00]                                       | 0.32<br>[0.10; 0.98] | 0.56<br>[0.24; 0.91]                                        | 1.59<br>[1.02; 2.19] | NA                            | -64.11<br>[-1041.18; 654.11]  |
| 5 - 6   | 0.10<br>[0.02; 0.71]                                       | 0.65<br>[0.29; 1.43] | 1.03<br>[0.57; 1.50]                                        | 2.43<br>[1.67; 3.20] | -72.29<br>[-1283.21; 1209.03] | -15.51<br>[-672.26; 668.63]   |
| 6 - 7   | 0.30<br>[0.10; 0.94]                                       | 0.58<br>[0.25; 1.34] | 1.55<br>[0.95; 2.15]                                        | 3.31<br>[2.36; 4.28] | -49.13<br>[-1172.20; 894.05]  | 165.75<br>[-2760.45; 2730.97] |
| 7 - 8   | 0.10<br>[0.01; 0.71]                                       | 0.53<br>[0.22; 1.26] | 2.13<br>[1.38; 2.88]                                        | 4.24<br>[3.10; 5.39] | -65.82<br>[-1230.74; 1139.92] | 349.83<br>[-5010.38; 6005.12] |
| 8 - 9   | 1.02<br>[0.55; 1.89]                                       | 1.70<br>[1.05; 2.77] | 2.77<br>[1.86; 3.67]                                        | 5.20<br>[3.86; 6.54] | 69.17<br>[-26.13; 340.70]     | 102.79<br>[20.34; 225.85]     |
| 9 - 10  | 0.80<br>[0.40; 1.60]                                       | 3.34<br>[2.36; 4.72] | 3.46<br>[2.40; 4.52]                                        | 6.16<br>[4.62; 7.68] | 210.63<br>[28.78; 1522.65]    | 75.60<br>[23.94; 129.79]      |
| 10 - 11 | 2.98<br>[2.10; 4.24]                                       | 7.82<br>[6.27; 9.77] | 4.19<br>[3.00; 5.42]                                        | 7.08<br>[5.35; 8.78] | 50.60<br>[2.63; 102.08]       | 7.79<br>[-17.50; 33.59]       |
| 11 - 12 | 3.23<br>[2.30; 4.52]                                       | 9.90<br>[8.13; 12.1] | 4.94<br>[3.55; 6.33]                                        | 7.92<br>[6.02; 9.81] | 24.16<br>[-18.69; 70.24]      | -25.35<br>[-43.57; -7.18]     |
| 12 - 13 | 6.56<br>[5.19; 8.29]                                       | 12.6<br>[10.6; 15.0] | 5.70<br>[4.13; 7.25]                                        | 8.66<br>[6.58; 10.7] | -18.30<br>[-40.96; 4.57]      | -1.39<br>[-20.10; 17.44]      |
| 13 - 14 | 10.1<br>[8.38; 12.2]                                       | 13.5<br>[11.4; 15.9] | 6.42<br>[4.69; 8.15]                                        | 9.26<br>[7.02; 11.5] | -21.55<br>[-39.49; -4.03]     | -17.35<br>[-33.76; -0.84]     |
| 14 - 15 | 10.9<br>[9.14; 13.1]                                       | 14.4<br>[12.2; 16.9] | 7.10<br>[5.20; 9.00]                                        | 9.72<br>[7.31; 12.1] | -21.34<br>[-38.62; -4.04]     | -15.19<br>[-31.57; -13.40]    |
| 15 - 16 | 9.90<br>[8.20; 12.0]                                       | 14.4<br>[12.2; 16.9] | 7.71<br>[5.64; 9.78]                                        | 10.0<br>[7.46; 12.6] | 7.52<br>[-15.22; 30.71]       | -13.40<br>[-31.61; 5.26]      |
| 16 - 17 | 10.8<br>[9.01; 12.9]                                       | 15.4<br>[13.2; 18.0] | 8.26<br>[6.02; 10.5]                                        | 10.2<br>[7.50; 12.9] | -4.76<br>[-26.02; 17.06]      | -25.38<br>[-42.61; -7.53]     |
| 17 - 18 | 11.0<br>[9.17; 13.1]                                       | 13.1<br>[11.0; 15.5] | 8.74<br>[6.34; 11.1]                                        | 10.3<br>[7.44; 13.2] | -26.83<br>[-49.58; -3.56]     | -34.06<br>[-56.92; -11.11]    |
| 18 - 19 | 9.11<br>[7.47; 11.1]                                       | 9.43<br>[7.71; 11.5] | 9.19<br>[6.63; 11.7]                                        | 10.4<br>[7.34; 13.4] | -7.40<br>[-34.55; 19.75]      | -9.67<br>[-40.63; 22.45]      |
| 19 - 20 | 3.99<br>[2.92; 5.45]                                       | 5.23<br>[3.96; 6.91] | 9.61<br>[6.90; 12.3]                                        | 10.4<br>[7.21; 13.6] | 78.02<br>[13.17; 147.91]      | 42.16<br>[-16.32; 101.94]     |
